# Supplementary material for: Methicillin-resistant Staphylococcus aureus emerged long before the introduction of methicillin into clinical practice
Source: PubMed Central journal article supplement (PMC5517843; doi:10.1186/s13059-017-1252-9), 2017-07-20
Supplement: 13059_2017_1252_MOESM2_ESM.pdf [file 13059_2017_1252_MOESM2_ESM.pdf]

| Jevons Strain ID | PHE ID                  | Celbenin MIC (ug/ml) | Source    | Date of Isolation | Sequence type | Resistance determinants present  |
|------------------|-------------------------|----------------------|-----------|-------------------|---------------|----------------------------------|
| 13137            | RH11000501              | 12.5-25              | Nurse B   | 2/10/1960         | 250           | <i>blaZ mecA tetK RpsL(K56R)</i> |
| 13137            | RH11000401 (NCTC 10442) | 12.5-25              | Nurse B   | 2/10/1960         | 250           | <i>blaZ mecA tetK RpsL(K56R)</i> |
| 13136            | RH10000391              | 6.5-12.5             | Patient A | 2/10/1960         | 250           | <i>blaZ mecA tetK RpsL(K56R)</i> |
| 13136            | RH11000492              | 6.5-12.5             | Patient A | 2/10/1960         | 250           | <i>blaZ mecA tetK RpsL(K56R)</i> |
| 10395            | RH10000386              | 6.25                 | Patient C | 21/07/1960        | 250           | <i>blaZ mecA tetK RpsL(K56R)</i> |
| 10396            | RH10000387              | 3.125                | Patient C | 05/07/1960        | 250           | <i>blaZ mecA tetK RpsL(K56R)</i> |
| 14083            | RH10000388              | 1.6                  | Patient C | 28/10/1960        | 250           | <i>blaZ tetK RpsL(K56R)</i>      |
| 14668            | RH10000375              | 25                   | Patient C | 08/11/1960        | 250           | <i>blaZ mecA tetK RpsL(K56R)</i> |
