# Supplementary material for: Methicillin-resistant Staphylococcus aureus emerged long before the introduction of methicillin into clinical practice
Source: PubMed Central journal article supplement (PMC5517843; doi:10.1186/s13059-017-1252-9), 2017-07-20
Supplement: 13059_2017_1252_MOESM4_ESM.pdf [file 13059_2017_1252_MOESM4_ESM.pdf]

| Antibiotic    | Accessory gene               | Protein Accession | DNA Accession    | Core gene                 | Mutation | Substitution | Reference |
|---------------|------------------------------|-------------------|------------------|---------------------------|----------|--------------|-----------|
| Penicillin    | <i>blaZ</i>                  | BLAC_STAAU        | CAA27733         |                           |          |              |           |
|               | <i>blaZ-D</i>                | Q53699_STAAU      | AAA26647         |                           |          |              |           |
|               | <i>blaZ-A</i>                | Q60250_STAAU      | AAA26644         |                           |          |              |           |
|               | <i>blaZ<sub>LGA251</sub></i> | F4NA56_STAAU      | CBZ41939         |                           |          |              |           |
| Methicilin    | <i>mecA</i>                  | O54286_STAAU      | AAQ75792         |                           |          |              |           |
|               | <i>mecC</i>                  | F4NA57_STAAU      | AKP21265         |                           |          |              |           |
| Ciprofloxacin |                              |                   |                  | <i>grlA</i>               |          | S80F         | [1]       |
|               |                              |                   |                  | <i>grlA</i> & <i>gyrA</i> |          | S80F, S84L   | [1]       |
|               |                              |                   |                  | <i>grlA</i> & <i>gyrA</i> |          | S80Y, S84L   | [1]       |
|               |                              |                   |                  | <i>grlA</i> & <i>gyrA</i> |          | S80F, E88K   | [1]       |
|               |                              |                   |                  | <i>grlA</i>               |          | S80Y         | [1]       |
| Moxifloxacin  |                              |                   |                  | <i>grlA</i> & <i>gyrA</i> |          | S80F, S84L   | [1]       |
|               |                              |                   |                  | <i>grlA</i> & <i>gyrA</i> |          | S80Y, S84L   | [1]       |
| Gentamicin    | <i>aacA-aphD</i>             | AACA_STAAM        | BAB47534         |                           |          |              |           |
| Amikacin      | <i>aphA-3</i>                | A8J4N5_STAAU      | BAF82029         |                           |          |              |           |
|               | <i>aadD</i>                  | KANU_STAAU        | CAA27142         |                           |          |              |           |
| Tobramycin    | <i>aadD</i>                  | KANU_STAAU        | CAA27142         |                           |          |              |           |
|               | <i>aacA-aphD</i>             | AACA_STAAM        | BAB47534         |                           |          |              |           |
| Streptomycin  | <i>str</i>                   | STR_STAAU         | CAA29839         |                           |          |              |           |
|               | <i>aad9</i>                  | S3AD_STAAN        | BAA82204         |                           |          |              |           |
|               | <i>aadE</i>                  | A8J4N2_STAAU      | BAF82028         |                           |          |              |           |
| Erythromycin  |                              |                   |                  | 23S rRNA                  | A2058T/G |              | [2]       |
|               |                              |                   |                  |                           | A2059G   |              | [2]       |
|               |                              | <i>ermA</i>       | ERMA_STAAN       | BAA82205                  |          |              |           |
|               |                              | <i>ermA-like</i>  | A1E139_STAEP     | ABK81677                  |          |              |           |
|               |                              | <i>ermB</i>       | Q799N2_STAAU     | ABQ00061                  |          |              |           |
|               |                              | <i>ermC</i>       | ERMC3_STAAU      | AAA20192                  |          |              |           |
|               |                              | <i>erm33</i>      | Q8KLN5_STASC     | CAC86410                  |          |              |           |
|               |                              | <i>ermT</i>       | D3GMR8_STAA5     | CAY48681                  |          |              |           |
|               |                              | <i>mefA</i>       | Q79RU3_STAAU     | AAL58635                  |          |              |           |
|               |                              | <i>mefE</i>       | Q8DPW8_STRR6     | AAK99775                  |          |              |           |
|               |                              | <i>msrA</i>       | A0A068LCQ4_STAAU | AIE40079                  |          |              |           |
|               |                              | <i>ereA</i>       | EREA_ECOLX       | AAO38247                  |          |              |           |
|               |                              | <i>ereB</i>       | EREB_ECOLX       | CAA27626                  |          |              |           |
|               | Clindamycin                  | <i>linA</i>       | Q6QHH8_STAAU     | AAS50177                  |          |              |           |
| <i>ermA</i>   |                              | ERMA_STAAN        | BAA82205         |                           |          |              |           |
| <i>ermC</i>   |                              | ERMC3_STAAU       | AAA20192         |                           |          |              |           |
| Tetracycline  | <i>tetK</i>                  | TCR_STAAU         | AAB07712         |                           |          |              |           |
|               | <i>tetM</i>                  | TETM_STAAM        | BAB56560         |                           |          |              |           |
|               | <i>tetL</i>                  | C7C2U6_STAA5      | CAY33088         |                           |          |              |           |
|               | <i>tetO</i>                  | TETO_STRMU        | AAA26679         |                           |          |              |           |
| Fusidic acid  |                              |                   |                  | <i>fusA</i>               |          | V90I         | [3]       |
|               |                              |                   |                  |                           |          | E444K        | [4]       |
|               |                              |                   |                  |                           |          | G451V        | [4]       |
|               |                              |                   |                  |                           |          | M453I        | [4]       |

|                        |               |                  |               |            |      |
|------------------------|---------------|------------------|---------------|------------|------|
|                        |               |                  |               | H457Y      | [4]  |
|                        |               |                  |               | L461K      | [4]  |
|                        |               |                  |               | L461S      | [4]  |
|                        |               |                  |               | P478S      | [4]  |
|                        |               |                  |               | M651I      | [4]  |
|                        |               |                  |               | P404L      | [4]  |
|                        |               |                  |               | G452S      | [5]  |
|                        |               |                  |               | H457Q      | [6]  |
|                        | <i>fusB</i>   | Q8GNY5_STAAU     | AAL12234      |            |      |
|                        | <i>fusC</i>   | A0A0P0YP43_STAHO | BAT22900      |            |      |
| <b>Linezolid</b>       |               |                  | 23S rRNA      | G2447T     | [7]  |
|                        |               |                  |               | T2500A     | [8]  |
|                        |               |                  |               | A2503G     | [9]  |
|                        |               |                  |               | T2504C     | [9]  |
|                        |               |                  |               | G2505A     | [10] |
|                        |               |                  |               | G2576T     | [11] |
|                        |               |                  | <i>rplD</i>   | K68Q       | [7]  |
|                        |               |                  | <i>rplC</i>   | G155R      | [7]  |
|                        |               |                  |               | ΔF127-H146 | [7]  |
|                        | <i>cfr</i>    | CFR_STASC        | CAC04525      |            |      |
| <b>Chloramphenicol</b> | <i>catA1</i>  | CAT2_STAAU       | AAA72572      |            |      |
|                        | <i>catA2</i>  | Q6V0Y2_STAAU     | AAQ55242      |            |      |
|                        | <i>catA3</i>  | CAT1_STAAU       | CAA24586      |            |      |
| <b>Mupirocin</b>       |               |                  | <i>ileS-1</i> | V588F      | [12] |
|                        |               |                  |               | G593V      | [12] |
|                        |               |                  |               | V631F      | [12] |
|                        | <i>ileS-2</i> | SYI2_STAAU       | CAA53189      |            |      |
| <b>Rifampicin</b>      |               |                  | <i>rpoB</i>   | S464P      | [13] |
|                        |               |                  |               | Q468R      | [13] |
|                        |               |                  |               | D471Y      | [13] |
|                        |               |                  |               | A477V      | [13] |
|                        |               |                  |               | A477D      | [13] |
|                        |               |                  |               | H481Y      | [13] |
|                        |               |                  |               | R484H      | [13] |
|                        |               |                  |               | D550G      | [13] |
| <b>Trimethoprim</b>    |               |                  | <i>dfrA</i>   | L41F       | [14] |
|                        |               |                  |               | F99S       | [14] |
|                        |               |                  |               | F99Y       | [14] |
|                        |               |                  |               | H150R      | [14] |
|                        | <i>dfrK</i>   | C7C2U7_STAA5     | CAY33090      |            |      |
|                        | <i>dfrB</i>   | DYR_STAAM        | BAB57588      |            |      |
|                        | <i>dfrG</i>   | Q4H3Y3_STAAU     | AQR07665      |            |      |
| <b>Disinfectants</b>   | <i>qacA</i>   | QACA_STAAM       | BAB47540      |            |      |
|                        | <i>qacC</i>   | QACC_STAAU       | AAA26666      |            |      |
|                        | <i>qacG</i>   | QACG_STAS9       | CAA76542      |            |      |
|                        | <i>qacH</i>   | QACH_STASA       | CAA76544      |            |      |

---

## References

1. Griggs DJ, Marona H, Piddock LJV. Selection of moxifloxacin-resistant *Staphylococcus aureus* compared with five other fluoroquinolones. *J. Antimicrob. Chemother.* Oxford University Press; 2003;51:1403–7.
2. Prunier A-L, Malbruny B, Laurans M, Brouard J, Duhamel J-F, Leclercq R. High rate of macrolide resistance in *Staphylococcus aureus* strains from patients with cystic fibrosis reveals high proportions of hypermutable strains. *J. Infect. Dis.* Oxford University Press; 2003;187:1709–16.
3. Lannergård J, Norström T, Hughes D. Genetic determinants of resistance to fusidic acid among clinical bacteremia isolates of *Staphylococcus aureus*. *Antimicrob. Agents Chemother.* American Society for Microbiology; 2009;53:2059–65.
4. Chen H-J, Hung W-C, Tseng S-P, Tsai J-C, Hsueh P-R, Teng L-J. Fusidic acid resistance determinants in *Staphylococcus aureus* clinical isolates. *Antimicrob. Agents Chemother.* American Society for Microbiology; 2010;54:4985–91.
5. Besier S, Ludwig A, Brade V, Wichelhaus TA. Molecular analysis of fusidic acid resistance in *Staphylococcus aureus*. *Mol Microbiol.* 2003;47:463–9.
6. Castanheira M, Watters AA, Mendes RE, Farrell DJ, Jones RN. Occurrence and molecular characterization of fusidic acid resistance mechanisms among *Staphylococcus* spp. from European countries (2008). *J. Antimicrob. Chemother.* Oxford University Press; 2010;65:1353–8.
7. Locke JB, Hilgers M, Shaw KJ. Novel ribosomal mutations in *Staphylococcus aureus* strains identified through selection with the oxazolidinones linezolid and torezolid (TR-700). *Antimicrob. Agents Chemother.* American Society for Microbiology; 2009;53:5265–74.
8. Meka VG, Pillai SK, Sakoulas G, Wennersten C, Venkataraman L, DeGirolami PC, et al. Linezolid resistance in sequential *Staphylococcus aureus* isolates associated with a T2500A mutation in the 23S rRNA gene and loss of a single copy of rRNA. *J. Infect. Dis.* Oxford University Press; 2004;190:311–7.
9. Livermore DM, Warner M, Mushtaq S, North S, Woodford N. *In vitro* activity of the oxazolidinone RWJ-416457 against linezolid-resistant and -susceptible staphylococci and enterococci. *Antimicrob. Agents Chemother.* American Society for Microbiology; 2007;51:1112–4.
10. Bourgeois-Nicolaos N, Massias L, Couson B, Butel M-J, Andreumont A, Doucet-Populaire F. Dose dependence of emergence of resistance to linezolid in *Enterococcus faecalis* *in vivo*. *J. Infect. Dis.* 2007;195:1480–8.
11. Tsiodras S, Gold HS, Sakoulas G, Eliopoulos GM, Wennersten C, Venkataraman L, et al. Linezolid resistance in a clinical isolate of *Staphylococcus aureus*. *Lancet.* 2001;358:207–8.
12. Hurdle JG, O'Neill AJ, Ingham E, Fishwick CWG, Chopra I. Analysis of mupirocin resistance and fitness in *Staphylococcus aureus* by molecular genetic and structural modeling techniques. *Antimicrob. Agents Chemother.* American Society for Microbiology; 2004;48:4366–76.
13. Aubry-Damon H, Soussy CJ, Courvalin P. Characterization of mutations in the *rpoB* gene that confer rifampin resistance in *Staphylococcus aureus*. *Antimicrob. Agents Chemother.* 1998;42:2590–4.
14. Vickers AA, Potter NJ, Fishwick CWG, Chopra I, O'Neill AJ. Analysis of mutational resistance to trimethoprim in *Staphylococcus aureus* by genetic and structural modelling techniques. *J. Antimicrob. Chemother.* Oxford University Press; 2009;63:1112–7.
